# Supplementary material for: Organ-targeted drug delivery systems (OTDDS) of poly[(N-acryloylglycine)-co-(N-acryloyl-l-phenylalanine methyl ester)] copolymer library and effective treatment of triple-negative breast cancer
Source: Royal Society of Chemistry journal article supplement (doi:10.1039/d4tb02445a), 2025-01-01
Supplement: d4tb02445a1.pdf [file d4tb02445a1.pdf]

## Supporting Information

# Organ Targeting Drug Delivery Systems (OTDDS) of poly[(*N*-acryloylglycine)-*co*-(*N*-acryloyl-L- phenylalanine methyl ester)] Copolymer Library and Effective treatment of Triple Negative Breast Cancer

*Sukanya Patra<sup>a</sup>, Jyotirmayee<sup>b</sup>, Krishan Kumar<sup>c</sup>, Divya Pareek<sup>a</sup>, Prem Shankar Gupta<sup>a</sup>, Anjali Mourya<sup>a</sup>,  
Taniya Das<sup>a</sup>, Kirti Wasnik<sup>a</sup>, Malkhey Verma<sup>b</sup>, Ruchi Chawla<sup>c</sup>, Tarun Batra<sup>d</sup>, Pradip Paik<sup>a\*</sup>*

<sup>a</sup>School of Biomedical Engineering, Indian Institute of Technology, (Banaras Hindu University), Varanasi,  
Uttar Pradesh, India, 221 005

<sup>b</sup>School of Biotechnology, Institute of Science, (Banaras Hindu University), Varanasi, Uttar Pradesh,  
India, 221 005

<sup>c</sup>Department of Pharmaceutical Engineering and Technology, Indian Institute of Technology (Banaras  
Hindu University), Varanasi, Uttar Pradesh, India, 221 005

<sup>d</sup>Department of Oncology, Institute of Medical Sciences (IMS), Banaras Hindu University, Varanasi,  
Uttar Pradesh, India, 221 005

## Synthesis of NAG monomers

**Solution A:** It was prepared in a 100 mL round-bottom flask, containing 20 mmol of glycine and 20 mL of aqueous 2 M KOH, which was maintained in an ice bath with continuous stirring at 600 RPM. **Solution B:** It was prepared in a 50 mL of round-bottom flask, containing 20 mmol of acryloyl chloride and 5 mL of 1,4-dioxane in an ice bath with continuous stirring at 900 RPM. Solution B was gradually added to Solution A over the course of one hour, ensuring continuous stirring to facilitate the reaction. Following the addition, the mixture was allowed to stir overnight at RT to ensure complete reaction. After 12h, the mixture was washed with 20 mL of diethyl ether for 3 times to remove unreacted materials and by products. The bottom layer was collected after each wash. The pH of the resulting solution was then adjusted to 2 by the dropwise addition of 5M HCl. Subsequently, the solution was saturated with excess NaCl, and the aqueous phase was extracted with 20 mL of ethyl acetate for 5 times to separate N-acryloyl glycine. The moisture was dried over  $\text{MgSO}_4$  and the filtrate was then subjected to rotary evaporation to concentrate the solution, yielding white powder named as *N*-acryloyl glycine (NAG).

## Synthesis of NAPA monomers

**Solution A:** It was prepared in a 100 mL round-bottom flask containing 1.6g of L-phenylalanine methyl ester, 1.6 mL of triethylamine, and 60 mL of dry DCM, which was maintained in an ice bath with continuous stirring at 600 RPM. **Solution B:** It was prepared in a 50 mL round-bottom flask containing 0.9 mL of acryloyl chloride in 5 mL of DCM. **Solution B** was gradually added to **Solution A** over the course of one hour, ensuring continuous stirring to facilitate the reaction. This controlled addition was important for exothermic nature of the reaction and enhance the formation of the desired product. After the complete addition, whole mixture was stirred for 24h. Further, DCM was removed using a rotary evaporator at 30 °C, yielding a white residue. Then 100 mL of ethyl acetate was added to the residue, and the mixture was

filtered using filter paper to remove insoluble impurities. The resulting solution underwent a series of wash, which include 40 mL of sodium sulfate ( $\text{NaHSO}_4$ ) five times, followed by 40 mL of sodium bicarbonate ( $\text{NaHCO}_3$ ) five times, and finally with 40 mL of brine solution three times. These washing steps are essential for the removal of impurities. Further, to ensure the removal of moisture,  $\text{MgSO}_4$  was added and filtered through a 0.45micron filter. The filtrate was then subjected to rotary evaporation to concentrate the solution, yielding white powder named as *N*-acryloyl-L-phenylalanine methyl ester (NAPA).

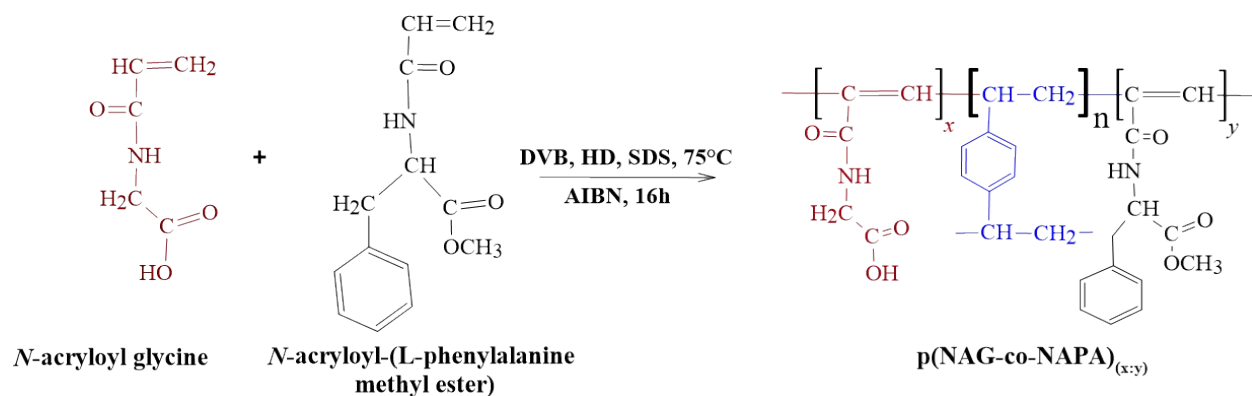

**Figure S1.** Schematic for the synthesis of  $\text{p(NAG-co-NAPA)}_{(x:y)}$  NPs.

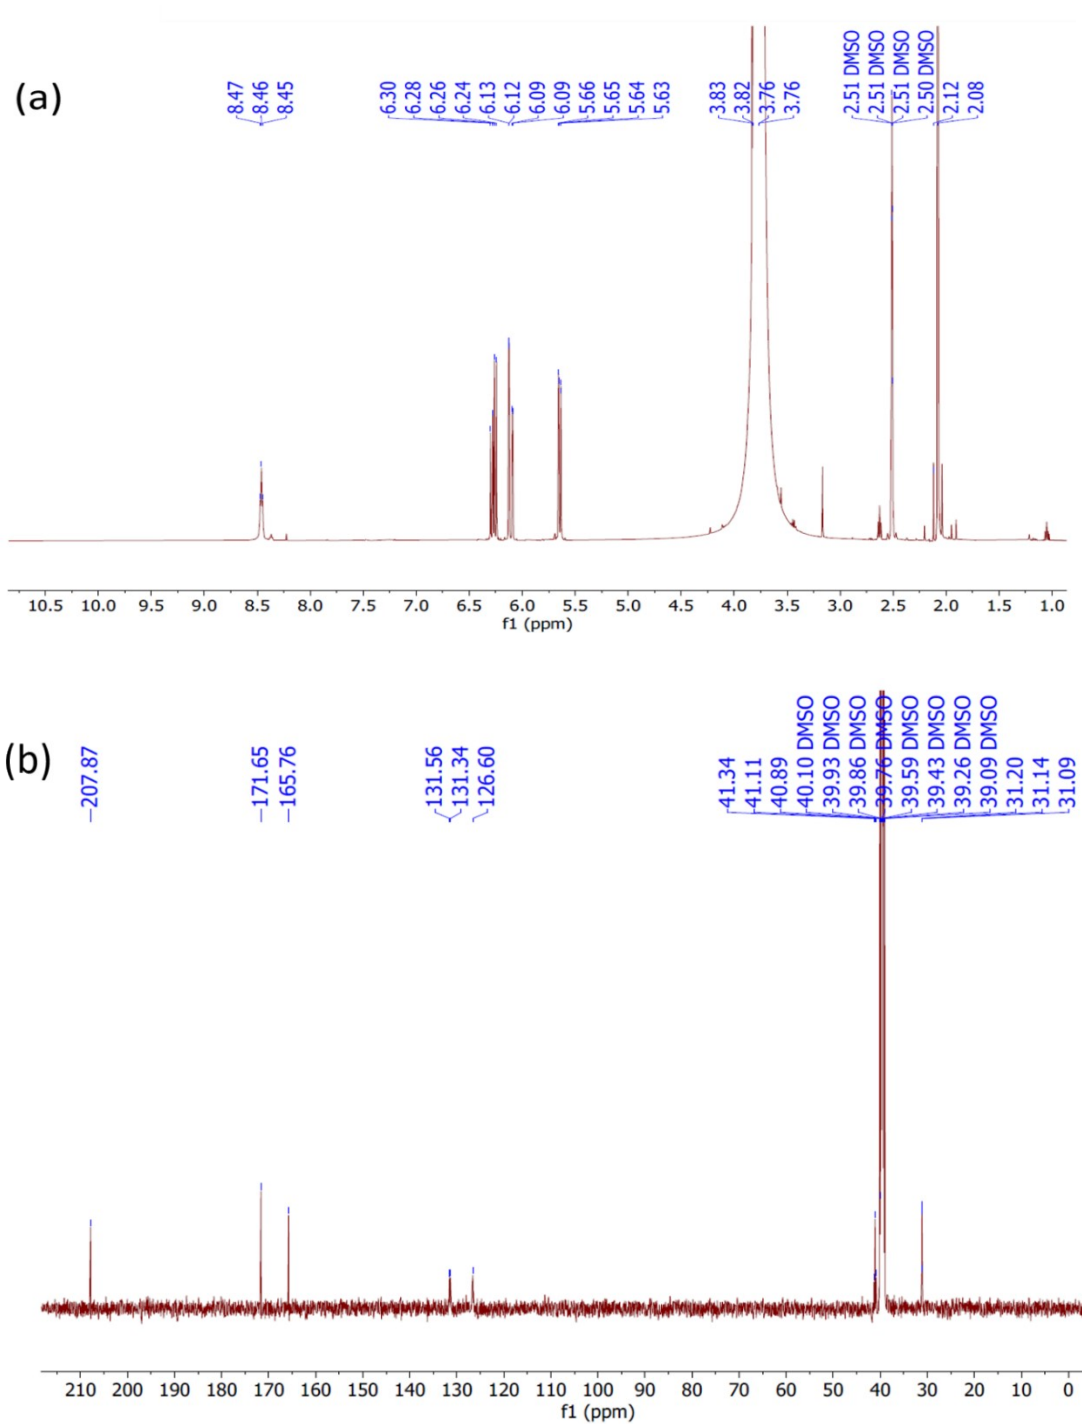

**Figure S2.** (a) <sup>1</sup>H NMR and (b) <sup>13</sup>C NMR of NAG. <sup>1</sup>H NMR (δ): 8.45 (1H, t (sec. amide)) 6.34, (-C (=O) N) gem 6.10 (-C (=O) N) cis and 5.62 (-C (=O) N) trans, 3.85 (2H, d), <sup>13</sup>C-NMR (δ): 165.4 (-NH-CO-), 171.7 (-

CO- (ester)), 126.1 and 131.7 (-C=C-), 41.1(-CH<sub>2</sub> aliphatic) are the corresponding ppm values. Already attached in our previous research article. Only for reference, it has been attached here.

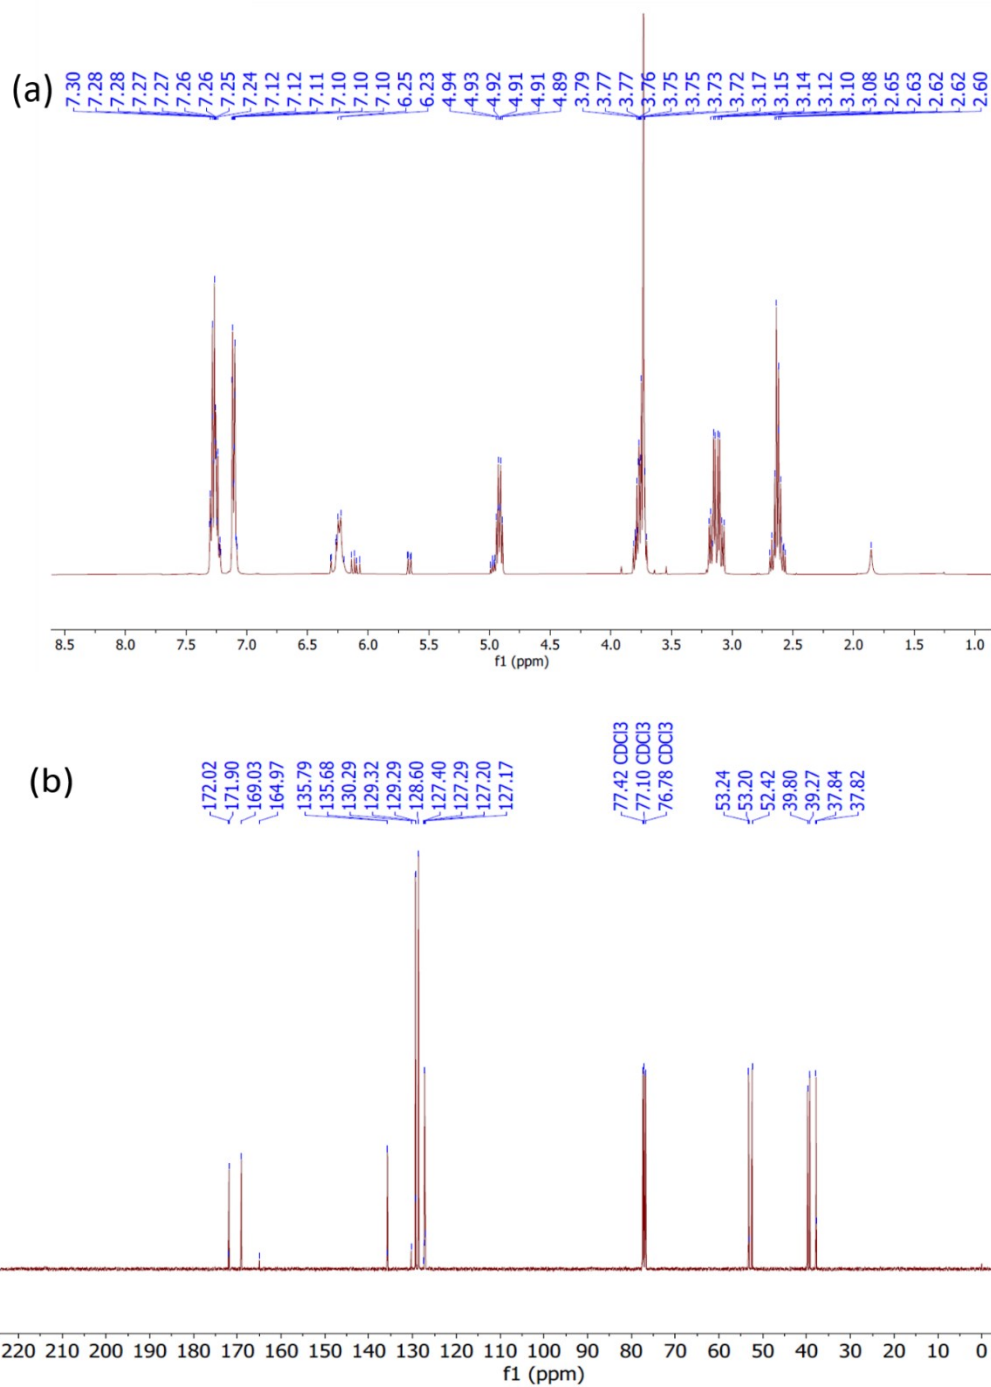

**Figure S3.** (a) <sup>1</sup>H NMR and (b) <sup>13</sup>C NMR of NAPA. <sup>1</sup>H NMR (δ): 7.3 (5H, m), 7.10, 6.25, and 6.23 (3H, alkene protons), 4.94 (1H, t), 3.79 (3H, s), 3.15 (2H, d) and <sup>13</sup>C-NMR (δ): 169.03(-NH-CO-), 172.02 (-CO-), 127 and

130.29 (-C=C) are the corresponding ppm values. Already attached in previous research article. Only for reference, it has been attached here.

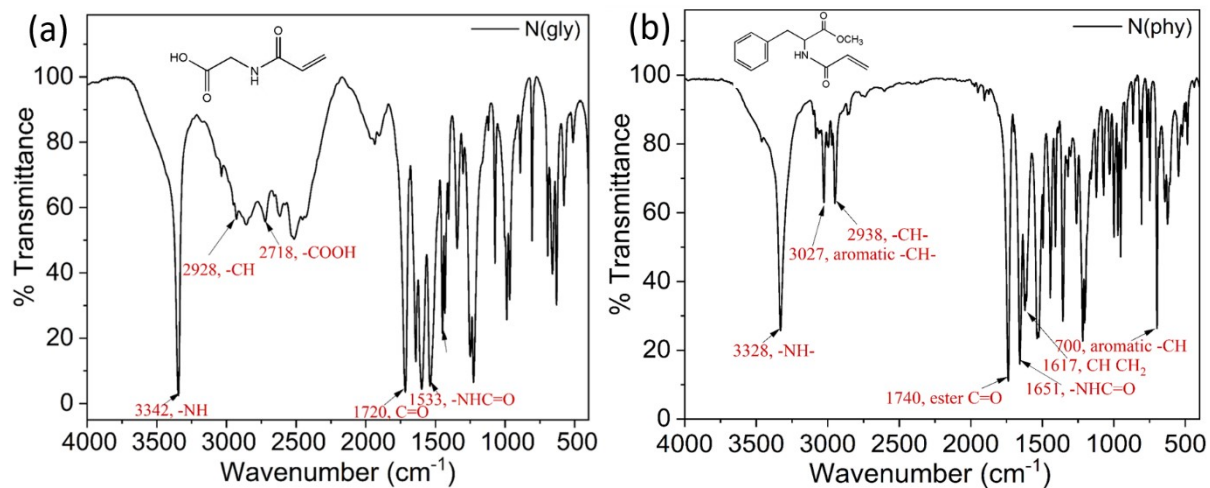

**Figure S4:** FTIR spectra of (a) NAG and (b) NAPA. Already attached in previous research article. Only for reference, it has been attached here. Respective distinct peaks corresponding to monomers are mentioned in figure (red colour).

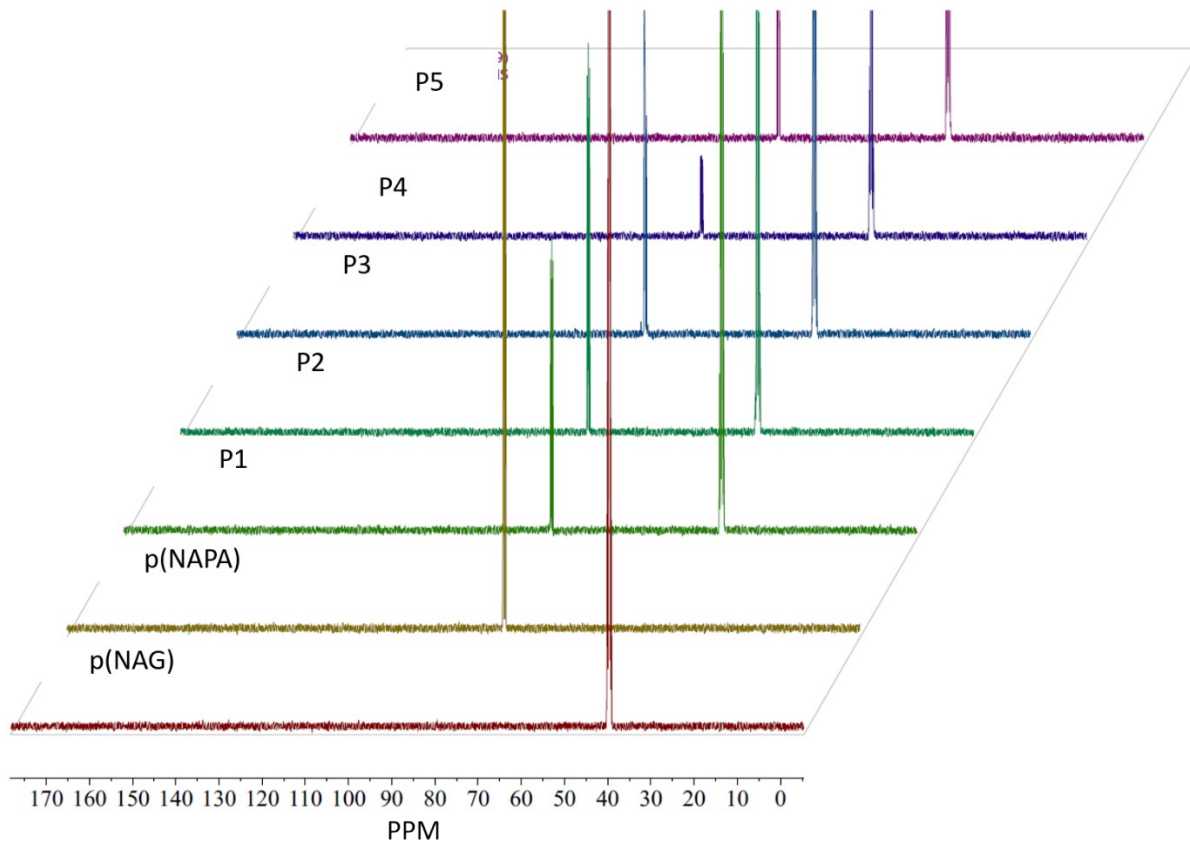

**Figure S5.** Represents stacked  $^{13}\text{C}$  NMR of p(NAG), p(NAPA), P1, P2, P3, P4, and P5. The single peak in the range of  $\delta = 40.27$  to  $39.18$ , indicating the presence of a split  $2^\circ$  alkane. The at  $\delta = 70$  ppm is due to solvent only.

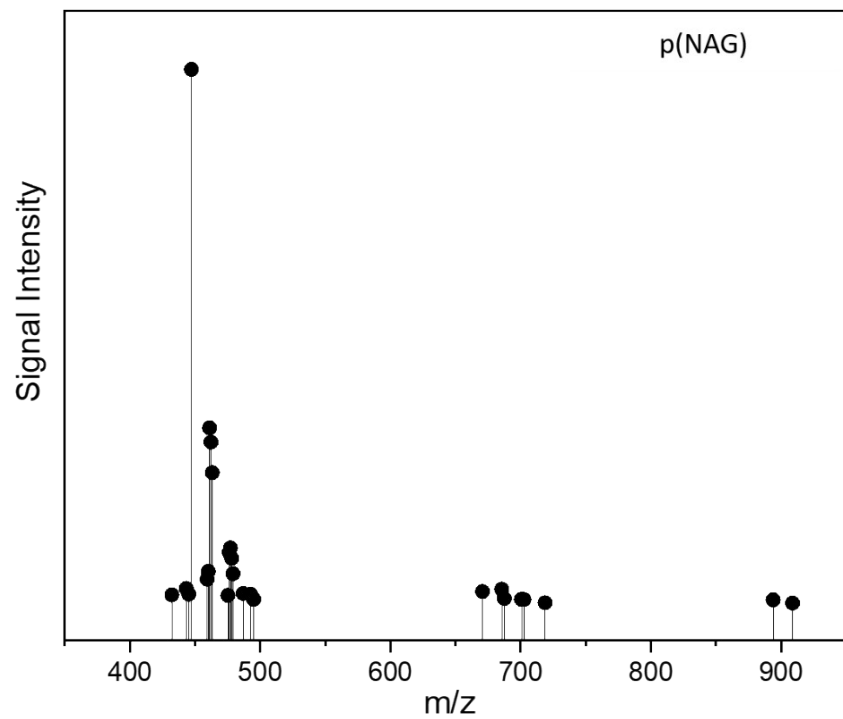

Figure S6. MALDI-ToF spectra of p(NAG) NPs.

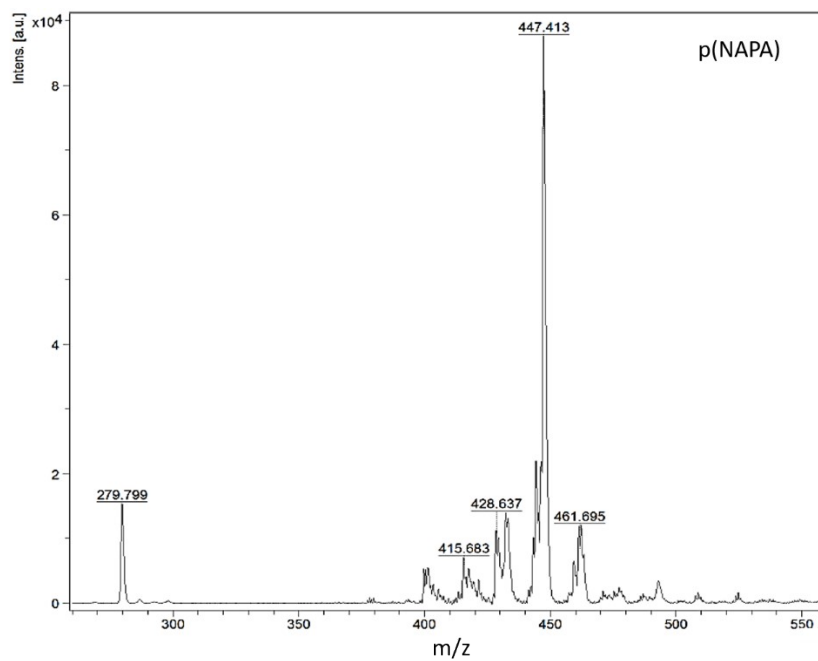

Figure S7. MALDI-ToF spectra of p(NAPA) NPs.



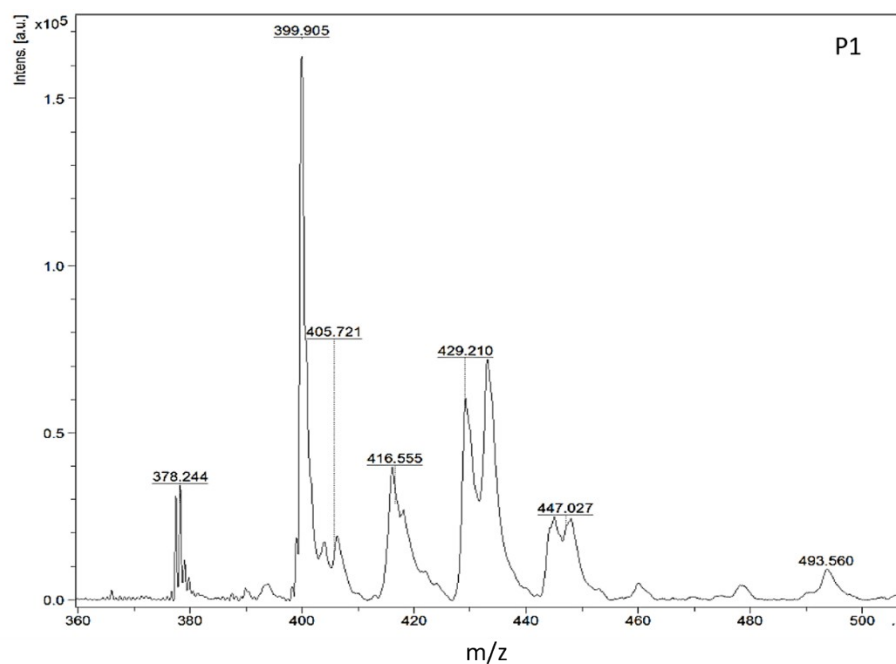

Figure S8. MALDI-ToF spectra of P1 NPs.

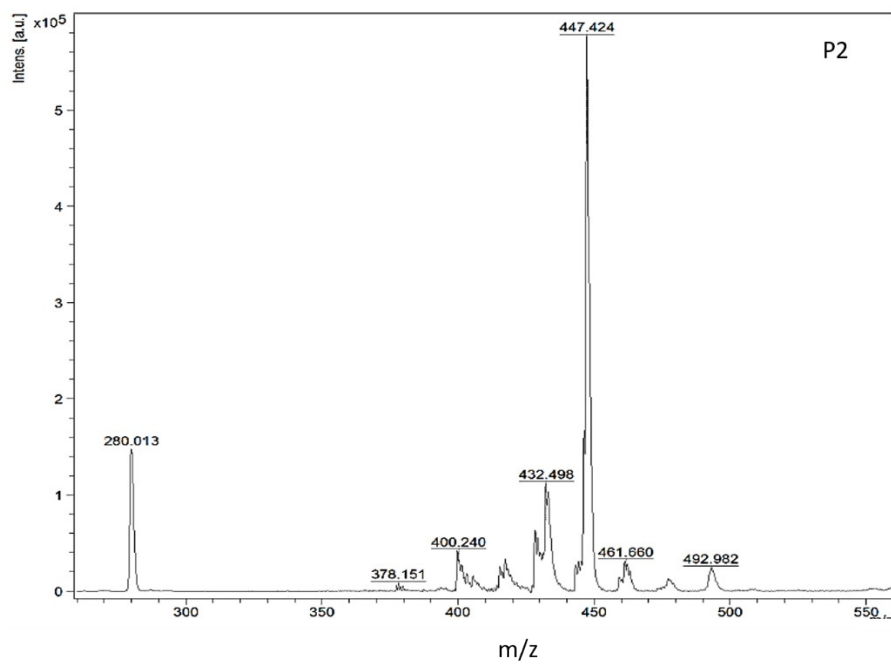

Figure S9. MALDI-ToF spectra of P2 NPs.

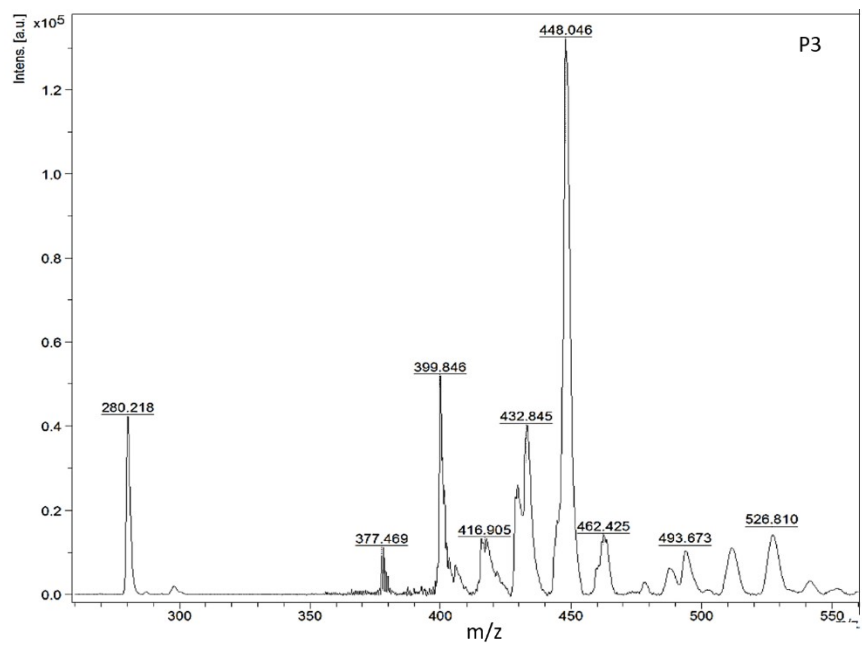

Figure S10. MALDI-ToF spectra of P3 NPs.

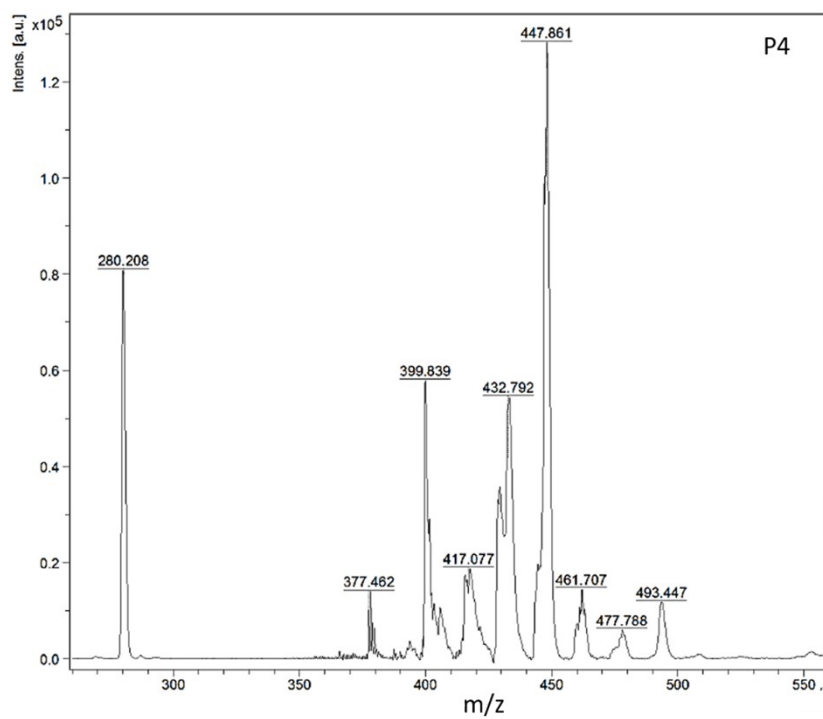

Figure S11. MALDI-ToF spectra of P4 NPs.

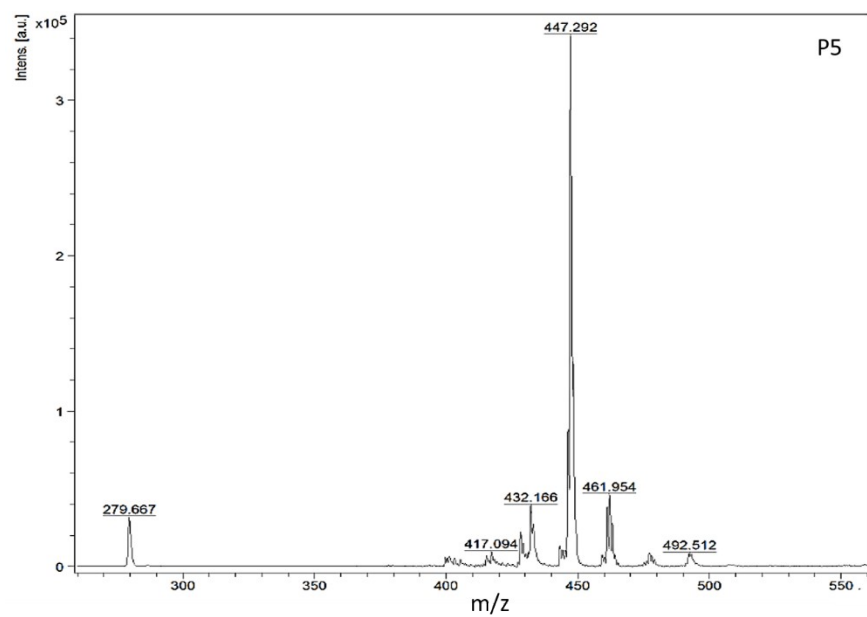

**Figure S12.** MALDI-ToF spectra of P5 NPs.

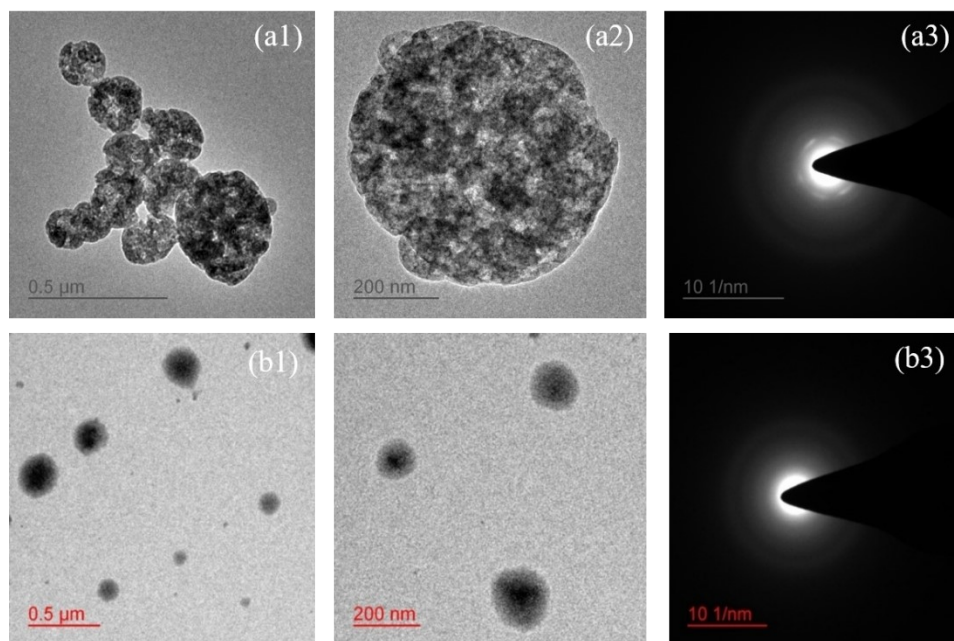

**Figure S13.** HRTEM images of (a1-a3) p(NAG) and (b1-b3) p(NAPA) NPs.

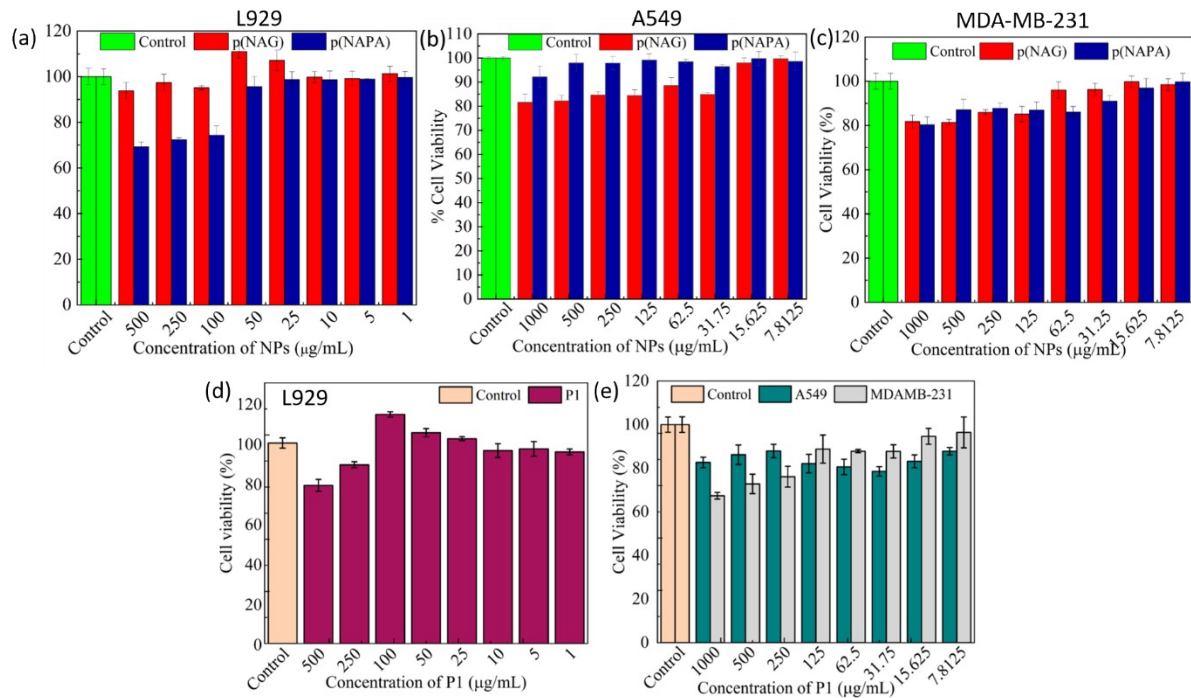

**Figure S14.** Cytotoxicity study of (a-c) p(NAG) and p(NAPA) NPs against L929, A549 and MDA-MB-231 cells and (d-e) P1 NPs against L929, A549 and MDA-MB-231 cells.

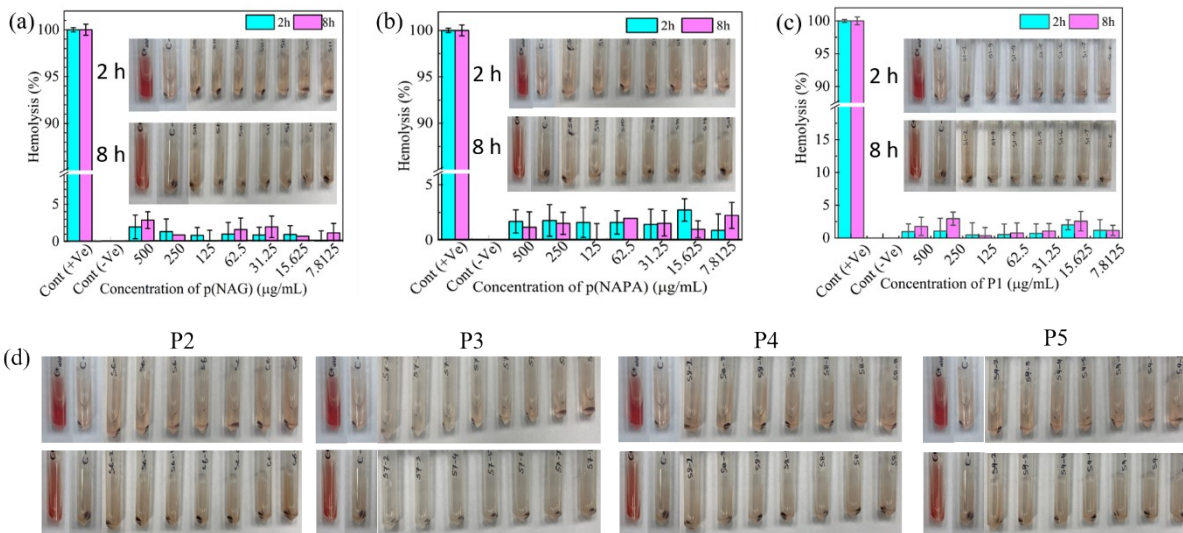

**Figure S15.** Hemolysis (%) of (a) p(NAG), (b) p(NAPA), (c) P1 NPs and (d) image representation of tubes at 2 and 8 h for P2 to P5 NPs.

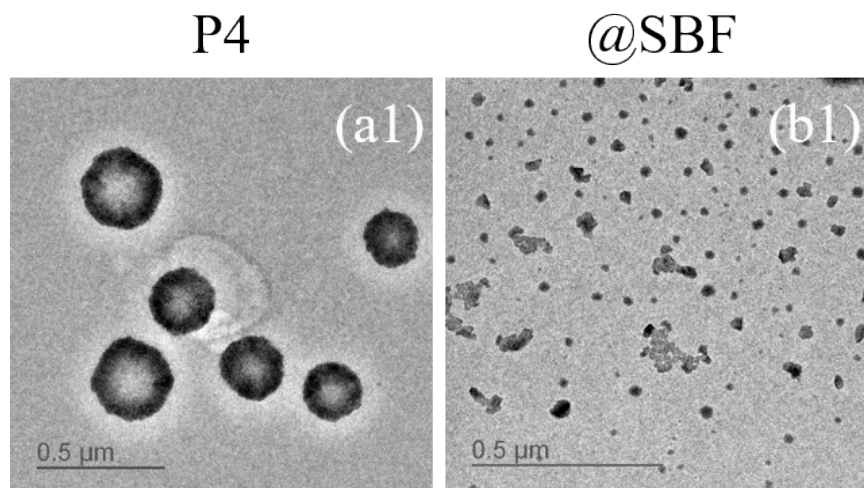

**Figure S16.** HRTEM micrograph of P4 NP incubated in SBF (pH 7.4). Results shows that after 7 days of incubation the P4 NPs degraded from 180-200 nm to fragments of 10-20 nm in size.

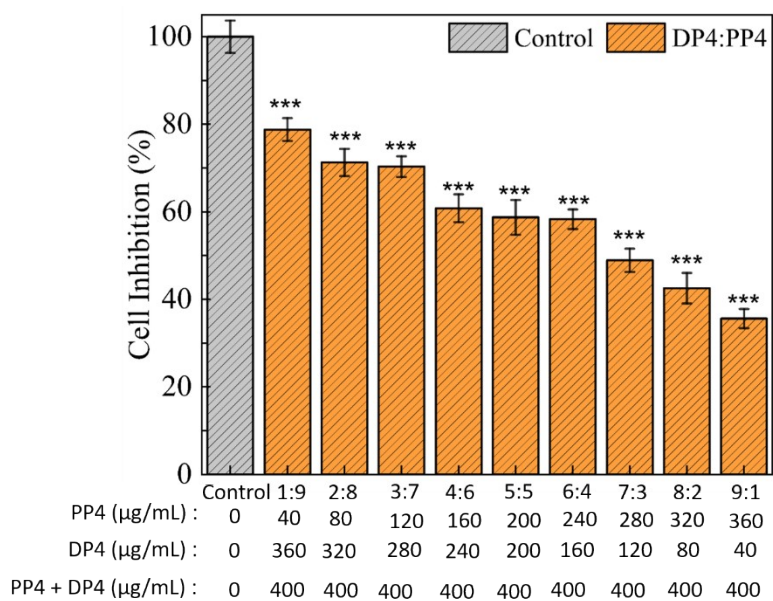

**Figure S17.** Cell inhibition (%) shown by DP4:PP4 at different ratio. The final concentration is fixed to 400  $\mu\text{g mL}^{-1}$ .

**Table S1.** List of chains, inhibitors and ions removed from protein structure before docking

| Protein Name     | Removal Item                                                                                                                                           |
|------------------|--------------------------------------------------------------------------------------------------------------------------------------------------------|
| Caspase-9        | Chain A, Zn <sup>2+</sup>                                                                                                                              |
| CDK2             | (4-amino-2-[[1-(methylsulfonyl)piperidin-4-yl]amino]pyrimidin-5-yl)(2,3-difluoro-6-methoxyphenyl)methanone                                             |
| ER $\alpha$      | Chain B, N-[(1R)-3-(4-HYDROXYPHENYL)-1-METHYLPROPYL]-2-(2-PHENYL-1H-INDOL-3-YL)ACETAMIDE                                                               |
| BCL-2            | 3-nitro-n-{4-[2-(2-phenylethyl)-1,3-benzothiazol-5-yl]benzoyl}-4-[[2-(phenylsulfanyl)ethyl]amino]benzenesulfonamide                                    |
| CXCR-2           | Cl <sup>-</sup>                                                                                                                                        |
| PR               | [[8s,11r,13s,14s,17r)-17-acetyl-11-[4-(dimethylamino)phenyl]-13-methyl-3-oxo-1,2,6,7,8,11,12,14,15,16-decahydrocyclopenta[a]phenanthren-17-yl] acetate |
| EGFR             | FLAVIN-ADENINE DINUCLEOTIDE, NADP NICOTINAMIDE-ADENINE-DINUCLEOTIDE PHOSPHATE, BICINE, caprolactone                                                    |
| $\beta$ -tubulin | Chain A, TAXOTERE, GUANOSINE-5'-TRIPHOSPHATE, GUANOSINE-5'-DIPHOSPHATE                                                                                 |
| Bax              | NA                                                                                                                                                     |
| p53              | NA                                                                                                                                                     |
| C-SRC            | Phosphoaminophosphonic acid-adenylate ester, l-peptide linking                                                                                         |

|                |                                                                                                                                                                                                                  |
|----------------|------------------------------------------------------------------------------------------------------------------------------------------------------------------------------------------------------------------|
| HSP90          | 5-(5-chloro-2,4-dihydroxyphenyl)-n-ethyl-4-[4-(morpholin-4-ylmethyl)phenyl]isoxazole-3-carboxamide                                                                                                               |
| P-glycoprotein | Chain B (4S,11S,18S)-4,11,18-tri(propan-2-yl)-6,13,20-triseleno-3,10,17,22,23,24-hexaazatetracyclo[17.2.1.1~5,8~.1~12,15~]tetracos-1(21),5(24),7,12(23),14,19(22)-hexaene-2,9,16-trione                          |
| AKT1           | 1-(1-(4-(7-phenyl-1H-imidazo[4,5-g]quinoxalin-6-yl)benzyl)piperidin-4-yl)-1H-benzo[d]imidazol-2(3H)-one                                                                                                          |
| CXCR4          | (6,6-dimethyl-5,6-dihydroimidazo[2,1-b][1,3]thiazol-3-yl)methyl N,N'-dicyclohexylimidothiocarbamate, (2R)-2,3-dihydroxypropyl (9Z)-octadec-9-enoate, Glycerol                                                    |
| VEGF-2         | Chain B                                                                                                                                                                                                          |
| HDAC3          | Chain A, Chain C, Chain D                                                                                                                                                                                        |
| mTOR           | Chain C, Chain B, RAPAMYCIN IMMUNOSUPPRESSANT DRUG, SULFATE ION                                                                                                                                                  |
| VEGF A         | Chain B, TRIETHYLENE GLYCOL, SULFATE ION                                                                                                                                                                         |
| CCR5           | Chain B, 4,4-difluoro-N-[(1S)-3-((3-exo)-3-[3-methyl-5-(propan-2-yl)-4H-1,2,4-triazol-4-yl]-8-azabicyclo[3.2.1]oct-8-yl)-1-phenylpropyl]cyclohexanecarboxamide, (2R)-2,3-dihydroxypropyl (9Z)-octadec-9-enoateZn |

|               |                                                                                                                                                                                                                                     |
|---------------|-------------------------------------------------------------------------------------------------------------------------------------------------------------------------------------------------------------------------------------|
| GSK 3 $\beta$ | Chain B, 4-(2-methoxyphenyl)-3,7,7-trimethyl-1,6,7,8-tetrahydro-5H-pyrazolo[3,4-b]quinolin-5-one, Both L-PEPTIDE LINKING                                                                                                            |
| TGF $\beta$ 1 | Chain B                                                                                                                                                                                                                             |
| DNMT3B        | Chain B, Chain C, Chain D, S-ADENOSYL-L-HOMOCYSTEINE                                                                                                                                                                                |
| STAT 3        | [(2-{{(5S,8S,10aR)-3-acetyl-8-((2S)-5-amino-1-[(diphenylmethyl)amino]-1,5-dioxopentan-2-yl)carbamoyl)-6-oxodecahydropyrrolo[1,2-a][1,5]diazocin-5-yl}carbamoyl)-1H-indol-5-yl)(difluoro)methyl]phosphonic acid (non-preferred name) |

**Table S2.** List of % of secondary structures present in different NPs of mini library.

| Sample Name | $\alpha$ -helix (%) | $\beta$ -sheet (%) | Turn | Random Coil (%) |
|-------------|---------------------|--------------------|------|-----------------|
| p(NAG)      | 21.9                | 0                  | 31.2 | 46.9            |
| p(NAPA)     | 0                   | 79.2               | 0    | 20.8            |
| P1          | 0                   | 0                  | 100  | 0               |
| P2          | 0                   | 0                  | 71.1 | 28.9            |
| P3          | 0                   | 0                  | 77.4 | 22.6            |
| P4          | 0                   | 44.6               | 33.8 | 23.6            |
| P5          | 0                   | 0                  | 55.5 | 44.5            |

**Table S3.** Statistical significance of Cytotoxicity study of NPs against L929 cells.

| Concentration<br>( $\mu\text{g mL}^{-1}$ ) | L929   |         |    |    |     |    |    |
|--------------------------------------------|--------|---------|----|----|-----|----|----|
|                                            | p(NAG) | p(NAPA) | P1 | P2 | P3  | P4 | P5 |
| 500                                        | ns     | **      | ns | ns | *** | ns | ** |



|                     |    |    |    |    |     |    |    |
|---------------------|----|----|----|----|-----|----|----|
| 250                 | ns | *  | ns | ns | **  | ns | ns |
| 100                 | ns | *  | ns | ns | **  | ns | *  |
| 50                  | ns | ns | ns | ns | *** | ns | ns |
| 25                  | ns | ns | ns | ns | **  | ns | ns |
| 10                  | ns | ns | ns | ns | **  | ns | ns |
| 5                   | ns | ns | ns | ns | **  | ns | ns |
| 1                   | ns | ns | ns | ns | ns  | ns | ns |
| ns: non-significant |    |    |    |    |     |    |    |

**Table S4.** Statistical significance of Cytotoxicity study of NPs against A549 cells.

| Concentration<br>( $\mu\text{g mL}^{-1}$ ) | A549   |         |    |    |    |     |     |
|--------------------------------------------|--------|---------|----|----|----|-----|-----|
|                                            | p(NAG) | p(NAPA) | P1 | P2 | P3 | P4  | P5  |
| 1000                                       | ns     | ns      | ns | ns | ** | *   | *** |
| 500                                        | ns     | ns      | ns | ns | *  | *** | **  |
| 250                                        | ns     | ns      | ns | ns | *  | ns  | **  |
| 125                                        | ns     | ns      | *  | ns | ns | ns  | ns  |
| 62.5                                       | ns     | ns      | *  | ns | ns | ns  | ns  |
| 31.25                                      | ns     | ns      | *  | ns | ns | ns  | ns  |
| 15.625                                     | ns     | ns      | ns | ns | ns | ns  | ns  |
| 7.8125                                     | ns     | ns      | ns | ns | ns | ns  | ns  |
| ns: non-significant                        |        |         |    |    |    |     |     |

**Table S5.** Statistical significance of Cytotoxicity study of NPs against MDA-MB-231 cells.

| Concentration | MDA-MB-231 |
|---------------|------------|
|               |            |

| ( $\mu\text{g mL}^{-1}$ ) | p(NAG) | p(NAPA) | P1 | P2 | P3 | P4 | P5 |
|---------------------------|--------|---------|----|----|----|----|----|
| 1000                      | ***    | ns      | ** | ns | *  | ns | ns |
| 500                       | ***    | ns      | *  | ns | *  | ns | ns |
| 250                       | ns     | ns      | *  | ns | ns | ns | ns |
| 125                       | *      | ns      | ns | ns | ns | ns | ns |
| 62.5                      | ns     | ns      | ns | ns | ns | ns | ns |
| 31.25                     | ns     | ns      | ns | ns | ns | ns | ns |
| 15.625                    | ns     | ns      | ns | ns | ns | ns | ns |
| 7.8125                    | ns     | ns      | ns | ns | ns | ns | ns |
| ns: non-significant       |        |         |    |    |    |    |    |

**Table S6.** Statistical significance of Hemolysis study of NPs at 2 h and 8 h.

| Concentration<br>( $\mu\text{g mL}^{-1}$ ) | Hemolysis |     |         |     |     |     |     |     |     |     |     |     |     |     |
|--------------------------------------------|-----------|-----|---------|-----|-----|-----|-----|-----|-----|-----|-----|-----|-----|-----|
|                                            | p(NAG)    |     | p(NAPA) |     | P1  |     | P2  |     | P3  |     | P4  |     | P5  |     |
|                                            | 2 h       | 8 h | 2 h     | 8 h | 2 h | 8 h | 2 h | 8 h | 2 h | 8 h | 2 h | 8 h | 2 h | 8 h |
| <b>500</b>                                 | ns        | ns  | ns      | ns  | ns  | *** | ns  | ns  | *** | *** | ns  | ns  | ns  | ns  |
| <b>250</b>                                 | ns        | ns  | ns      | ns  | ns  | ns  | ns  | *   | *** | **  | ns  | ns  | ns  | ns  |
| <b>125</b>                                 | ns        | ns  | ns      | ns  | ns  | ns  | ns  | ns  | ns  | ns  | ns  | ns  | ns  | ns  |
| <b>62.5</b>                                | ns        | ns  | ns      | ns  | ns  | ns  | ns  | ns  | ns  | ns  | ns  | ns  | ns  | ns  |
| <b>31.25</b>                               | ns        | ns  | ns      | ns  | ns  | ns  | ns  | ns  | ns  | ns  | ns  | ns  | ns  | ns  |
| <b>15.625</b>                              | ns        | ns  | ns      | ns  | ns  | ns  | ns  | ns  | ns  | ns  | ns  | *   | ns  | *   |
| <b>7.8125</b>                              | ns        | ns  | ns      | ns  | ns  | ns  | *   | ns  |
| ns: non-significant                        |           |     |         |     |     |     |     |     |     |     |     |     |     |     |

**Table S7.** List of proteins with their respective PDB ID considered for individual docking with ligands (piperine and DHA) and their binding energy, inhibition constant and amino acid residues.

| Protein Name | PDB ID | Ligand   | Binding Energy (kcal/mol) | Inhibition Constant ( $\mu$ M) | Amino acid residues                                                                                                           |
|--------------|--------|----------|---------------------------|--------------------------------|-------------------------------------------------------------------------------------------------------------------------------|
| Bax          | 1f16   | DHA      | -6.17                     | 30.25                          | Glu44, Leu125, Ala35, Leu45, Asp48, Gln32, Ala42, Pro43                                                                       |
| Bax          | 1f16   | Piperine | -7.92                     | 1.57                           | Trp151, Leu 148,Arg147,Arg109, Asn106, Phe105, Met99, Gly103, Asn104, Asp102,Phe100                                           |
| CASPAS E-9   | 1nw9   | DHA      | -7.77                     | 2                              | Pro336, Thr337, Leu275, Gly276, Lys280, Gly269, Phe267, Asn268, Pro338, Ile341, Ser339                                        |
| CASPAS E-9   | 1nw9   | Piperine | -6.62                     | 14.14                          | Pro336, Leu335, Lys280, Phe267, Asn268, Ile341, Val264, As265, Pro338, ser339, Thr337                                         |
| Tubilin      | 1tub   | DHA      | -9.89                     | 56.26                          | Gln43, Ile24, Glu22, Phe83, Val78, Gly84, Ile86, Ala65, Trp21, Leu44, Pro63, Ser25                                            |
| Tubilin      | 1tub   | Piperine | -10.58                    | 0.01746                        | Gln8, Phe83, Ile24, Gly58, Pro63, asn59, Arg48, Tyr61, Ser25, Lys60, Glu47, Val162, Gln43, Trp21, Leu44, Val178, Ala18, gly17 |
| p53          | 1ycr   | DHA      | -7.76                     | 2.06                           | Gln59, Phe55, Leu54, Leu26, Trp23, Lys24, Met62                                                                               |
| p53          | 1ycr   | Piperine | -6.93                     | 8.32                           | Met62, Ser20, Trp23, Lys24, Glu28, Leu26, Leu54, Lys51, Phe55, Gln59                                                          |
| CDK2         | 2fvd   | DHA      | -7.5                      | 3.2                            | Gly16, Lys33, Asp145, Thr14, Tyr15, Gly13                                                                                     |
| CDK2         | 2fvd   | Piperine | -9.31                     | 0.15                           | Phe82, Ala31, Ala144, Leu134, Lys89, His84, Leu83                                                                             |

|                |      |          |       |       |                                                                                                 |
|----------------|------|----------|-------|-------|-------------------------------------------------------------------------------------------------|
| Er Alpha       | 2iok | DHA      | -8.37 | 0.728 | Phe445, Pro324, Glu353, Pro325, Ile326, Trp393, Arg394, Gly390, Ile386, Lys449                  |
| Er Alpha       | 2iok | Piperine | -8.43 | 0.663 | Gly420, Met421, Leu428, Ile424, Arg394, Phe404, Leu391, Leu387, Glu353, Met388, His 524, Gly521 |
| Bcl-2          | 2o21 | DHA      | -7.38 | 3.9   | Glu149, Phe101, Phe109, Met112, Glu133, Val130, Phe150, Val131, Leu134, Ala146                  |
| Bcl-2          | 2o21 | Piperine | -7.26 | 4.76  | Leu94, Trp192, Phe194, Gly191, Trp141, Asn189, Leu198, Ala194, Leu182, Ile144, Ile186           |
| C-SRC          | 2src | DHA      | -7.34 | 4.13  | Lys458, Leu360, Leu363, Thr456, Pro488, Cys487, Glu486, Leu358                                  |
| C-SRC          | 2src | Piperine | -6.89 | 8.83  | Met341, Leu393, Val281, Cys277, Gly276, Arg388, Leu273, Ala293                                  |
| HSP90          | 2vcj | DHA      | -6.07 | 35.74 | Thr109, Gly108, Leu107, Lys58, Ile96, Gly97, Ala55, Thr184, Met98, Asn51                        |
| HSP90          | 2vcj | Piperine | -7.07 | 6.53  | Thr184, Met98, Asn51, Thr109, Gly108, Gly135, Leu107, Val186, Phe138, Leu48                     |
| P-glycoprotein | 3g61 | DHA      | -5.67 | 69.4  | Gln326, Val732, Phe310, Ile214, Leu210, Thr314, Ile318, Tyr322, Trp311                          |
| P-glycoprotein | 3g61 | Piperine | -8.05 | 1.25  | Phe263, Thr259, Val253, Val260, Leu793, Met792, Phe789, Leu254, Ala255, Phe1119, Ala256         |
| AKT1           | 3o96 | DHA      | -8.23 | 0.93  | Ile290, Thr211, Thr291, Asp292, Leu210, Ala212, Ser205, Leu213, Val270, Trp80, Leu264           |
| AKT1           | 3o96 | Piperine | -6.09 | 34.64 | Cys296, Thr160, Lys158, Leu295, Val164, Leu156, Phe293, Gly157,                                 |

|         |      |          |       |       |                                                                                                                                                              |
|---------|------|----------|-------|-------|--------------------------------------------------------------------------------------------------------------------------------------------------------------|
|         |      |          |       |       | Glu298, Gly159, Lys297                                                                                                                                       |
| CXCR4   | 3oe6 | DHA      | -6.64 | 13.49 | Ala303, Gly55, Pro299, Val59, Val62, Tyr302, Leu305                                                                                                          |
| CXCR4   | 3oe6 | Piperine | -6.92 | 8.51  | Leu69, Gln66, Met63, leu58, val159, pro299, gly55. ala303, val62, Asp74, Tyr302                                                                              |
| VEGFR-2 | 3v2a | DHA      | -6.28 | 25.04 | Gln210, Ala202, Tyr209, Glu201, Val159, Trp179, Leu151, Cys150, Cys200, Ser211                                                                               |
| VEGFR-2 | 3v2a | Piperine | -5.86 | 50.25 | Ile212, Pro149, Leu151, Cys150, Ala202, Val159, Trp179, Tyr209, Gln210, Glu201, Ser211, Tyr214                                                               |
| HDAC3   | 4a69 | DHA      | -6.27 | 25.25 | Ala20, Phe144, Gly21, Pro23, Asp93, Asp92, His22, Tyr18, Pro95                                                                                               |
| HDAC3   | 4a69 | Piperine | -8.41 | 0.683 | Asp259, Leu266, Phe144, Tyr298, Met24, GLY296, Cys145, Gly143, Gly132, Gly295, His135, Leu133, Gln255, Asp175, Asp168, His134, His172, Asp170, Phe200, Asp93 |
| mTOR    | 4drh | DHA      | -6.59 | 14.83 | Tyr113, Val186, Phe77, Gln85, Ile87                                                                                                                          |
| mTOR    | 4drh | Piperine | -7.48 | 3.28  | Phe2108, Leu2031, Trp2101, Ser2035, Leu2097, The2098, Phe2039, Asp2102, Tyr2105, Glu2032                                                                     |
| CxCR2   | 4jl7 | DHA      | -7.1  | 6.24  | Arg80, Ile79, Tyr24, Phe26, Gly25, Gly23, Lys19, Asn22                                                                                                       |
| CxCR2   | 4jl7 | Piperine | -7.03 | 7.08  | Glu43, Asn22, Gly25, Phe26, Try24, Gly23, Ile79, Arg80, His27                                                                                                |
| VEGF-A  | 4kzn | DHA      | -5.63 | 74.2  | Glu42, Met94, Tyr39, Ser95, Glu93, Arg82, Phe47                                                                                                              |
| VEGF-A  | 4kzn | Piperine | -6.77 | 10.87 | Pro40, Glu42, Tyr39, Asn75, Leu97,                                                                                                                           |

|           |      |          |       |        |                                                                                                                |
|-----------|------|----------|-------|--------|----------------------------------------------------------------------------------------------------------------|
|           |      |          |       |        | Glu38, Asp41                                                                                                   |
| CCR5      | 4mbs | DHA      | -6.17 | 29.88  | Tyr37, Glu283, Tyr108, Trp86                                                                                   |
| CCR5      | 4mbs | Piperine | -7.45 | 3.45   | Trp248, Tyr108, Glu283, Phe109, Trp86, Tyr37, Tyr251, Phe112                                                   |
| PR        | 4oar | DHA      | -7.96 | 1.46   | Met756, Met759, Arg766, Leu763, Phe778, Leu721, Gln725, Leu718, Gly722, Leu887, Val760, Met801                 |
| PR        | 4oar | Piperine | -8.18 | 1.01   | Arg766, Leu763, Met759, Val760, Met756, Leu887, Met801, Leu797, Tyr890, Thr894, Cys891, Phe778, Leu721, Gln725 |
| EGFR      | 4rg3 | DHA      | -8.11 | 1.14   | Asp39, Ala142, Gly15, Val143, Phe38, Lys40, Ile14, Asn388, Ser147, Trp50, Gly46                                |
| EGFR      | 4rg3 | Piperine | -9.24 | 0.169  | Thr110, val112, Glu111, Gly46, Thr47, Gly144, Phe18, Ile441, Gly19, Ala142, Asp39, Gly15, Lys40, Phe38, Ile14  |
| GSK3 Beta | 5hlp | DHA      | -7.05 | 6.84   | Pro136, Val135, Tyr134, Ala83, Leu132, Asp133, Cys199, Leu188, Thr138                                          |
| GSK3 Beta | 5hlp | Piperine | -5.39 | 111.69 | Gln99, Lys94, Asn95, Asp90, Phe93, Gln89, Val126, Tyr177, Leu98, Arg102                                        |
| TGF-Beta1 | 5vqp | DHA      | -5.71 | 65.53  | Leu51, Val48, Thr55, Tyr52, Lys77, Glu78, Val79                                                                |
| TGF-Beta1 | 5vqp | Piperine | -8.04 | 1.28   | His222, Arg215, Ile221, Tyr92, Val85, Tyr103, Ile91, Phe105, Asn89, Thr87, Glu86, His88                        |
| DNMT3 B   | 6kdl | DHA      | -7.83 | 1.83   | Arg832, Cys651, Glu697, Ser833, Trp834, Asp582, Gly583, Phe581, Glu605, Pro650, Gly648, Ser649                 |

|            |      |          |       |       |                                                                                                      |
|------------|------|----------|-------|-------|------------------------------------------------------------------------------------------------------|
| DNMT3<br>B | 6kdl | Piperine | -9.26 | 0.162 | Arg832, Ser604, Glu605, Val606,<br>Gly648, Val628, Phe581, Asp627,<br>Trp834, Leu671, Ser833, Asp582 |
| Stat3      | 6njs | DHA      | -6.82 | 9.98  | Asp334, Lys573, Asp570, Ile569,<br>Lys574, Arg335, Met331, His332,<br>Pro333                         |
| Stat3      | 6njs | Piperine | -6.15 | 30.96 | Arg609, Pro639, Thr620, Glu638,<br>Ser636, Tyr657, Val637, Glu612,<br>Ser613, Ser611                 |

**Table S8.** Docking results of 8 selected proteins with combination of ligands (piperine followed by DHA)

| Sr.<br>No. | PDB<br>ID | Combination type (Piperine_DHA) |                                      |                                                                                                                                                     |                                                                                                           | Paclitaxel                      |                                      |                                                                                                                                                        |
|------------|-----------|---------------------------------|--------------------------------------|-----------------------------------------------------------------------------------------------------------------------------------------------------|-----------------------------------------------------------------------------------------------------------|---------------------------------|--------------------------------------|--------------------------------------------------------------------------------------------------------------------------------------------------------|
|            |           | Binding<br>Energy<br>(kcal/mol) | Inhibition<br>constant<br>( $\mu$ M) | Amino acid residues                                                                                                                                 |                                                                                                           | Binding<br>Energy<br>(kcal/mol) | Inhibition<br>constant<br>( $\mu$ M) | Amino<br>acid<br>residues                                                                                                                              |
|            |           |                                 |                                      | Piperine                                                                                                                                            | DHA                                                                                                       |                                 |                                      |                                                                                                                                                        |
| 1          | 1tub      | -7.87                           | 1.69                                 | Gln8, Phe83,<br>Ile24, Gly58,<br>Asn59, Pro63,<br>Arg48, Tyr61,<br>Ser25, Lys60,<br>Glu47, Val62,<br>Gln43, Trp21,<br>Leu44, Val78,<br>Ala18, Gly17 | Leu371,<br>Ser232,<br>His229,<br>Phe272,<br>Leu230,<br>Ala233,<br>Leu217,<br>Leu275,<br>Thr276,<br>Pro274 | -6.24                           | 26.47                                | Thr314, Pro261,<br>Val260,<br>Phe262,<br>Pro263,<br>Arg264,<br>Glu431, Tyr435,<br>Trp346, Ile347                                                       |
| 2          | 4jl7      | -6.58                           | 15                                   | Asn22, His27,<br>Gly25, DHA,<br>Ile79, Phe26,<br>Arg80, Gly23,<br>Tyr24, Glu43                                                                      | His27, PIP,<br>Phe26, Arg80,<br>Leu28, Val176,<br>His72                                                   | -4.81                           | 300.48                               | Phe26, Gly25,<br>Arg80, Ile79,<br>Val76, His72,<br>Gis29, Gly30,<br>His27, Arg40,<br>Leu28, Gly23,<br>Tyr24                                            |
| 3          | 1nw9      | -7.09                           | 6.32                                 | Pro336, Leu335,<br>Lys280, Phe267,<br>Asn268, Ile341,<br>Val264, Asn265,<br>Pro338, Ser339,<br>Thr337                                               | Lys414,<br>Arg146,<br>Thr415,<br>Phe413,<br>Try153,<br>Phe412,<br>Leu155,<br>Ser156                       | -6.83                           | 9.89                                 | Thr347, Gly395,<br>phe348, Ile396,<br>Pro349, Trp354,<br>phe351,<br>Gly350, Arg355,<br>Lys398, arg178,<br>Leu177, Gly176,<br>His237, Cys287,<br>Gly288 |
| 4          | 2o21      | -7.47                           | 3.37                                 | Leu94, trp192,<br>Phe195, Gly191,<br>Trp141, Asn189,<br>Leu198, Ala194,                                                                             | Ala146,<br>Glu149,<br>Leu134,<br>Phe150,                                                                  | -5.3                            | 129.56                               | Arg143, tyr105,<br>Gly142, tyr199,<br>Ala97, Gln96,<br>Thr93, Pro201,                                                                                  |

|   |      |       |      |                                                                                                                     |                                                                                        |       |        |                                                                                                                |
|---|------|-------|------|---------------------------------------------------------------------------------------------------------------------|----------------------------------------------------------------------------------------|-------|--------|----------------------------------------------------------------------------------------------------------------|
|   |      |       |      | Leu182, Ile144, Ile186                                                                                              | Val130, Val131, Glu133, Met112, Phe109, Phe101                                         |       |        | Asp100, Val145, Phe101, Arg104                                                                                 |
| 5 | 4oar | -7.15 | 5.69 | Gln725, Phe778, Leu721, Met759, DHA, Thr894, Leu797, Leu887, Cys891, Tyr890, Met801, Val760, Met756, Arg766, Leu763 | PIP, Trp755, Gly722, leu726, Met759, Gly723, Asn719, Leu718                            | -2.63 | 11780  | Gln752, Ile751, Trp755, Gln916, Asn719, Ala915, Phe895, Leu726, Val730                                         |
| 6 | 2iok | -8.22 | 0.94 | Glu353, Met421, Gly420, Gly521, His524, Arg394, Leu391, Leu387, Met388, Phe404, Ile424, Leu428                      | Glu353, Leu327, Pro325, Ile326, try393, Arg394, Phe445, Gly390, lys449, Pro324, Ile386 | -4.29 | 716.79 | Leu536, Glu380, Ala350, Trp383, Leu354, Thr347, Asp351, Val355, Leu539, Pro535, Tyr526, Lys529, Met528, Leu525 |
| 7 | 4rg3 | -7.44 | 3.5  | Thr110, Val112, Glu111, Gly46, Thr47, Gly144, Phe18, Ile441, Gly19, Ala142, Asp39, gly15, Lys40, Phe38, Ile14       | Thr60, tyr65, Phe248, Thr47, ser58, Asp59, Leu57, Arg329, trp48                        | -1.84 | 44580  | His166, Trp50, Lys40, Arg52, Asp42, Tyr49, Glu172, Pro171, Trp170, Ala169, Thr164, phe151                      |
| 8 | 2fvd | -7.89 | 1.64 | Ala31, Ala144, Leu134, Lys89, His84, Leu83, Phe82                                                                   | Lys33, Gly16, Asp145, Gly13, Tyr15, Thr14                                              | -4.76 | 326.45 | Ile10, Glu12, Gly11, Gln131, Asn132, Glu162, Lys88, Asp86, Lys89, Asp92                                        |

**Table S9.** Docking results of 8 selected proteins with combination of ligands (DHA followed by piperine)

| Sr. No. | PDB ID | Combination type (DHA_piperine) |                                |                                           |                                                                   | Paclitaxel                |                                |                                                 |
|---------|--------|---------------------------------|--------------------------------|-------------------------------------------|-------------------------------------------------------------------|---------------------------|--------------------------------|-------------------------------------------------|
|         |        | Binding Energy (kcal/mol)       | Inhibition constant ( $\mu$ M) | Amino acid residues                       |                                                                   | Binding Energy (kcal/mol) | Inhibition constant ( $\mu$ M) | Amino acid residues                             |
|         |        |                                 |                                | DHA                                       | Piperine                                                          |                           |                                |                                                 |
| 1       | 1tub   | 14.53                           | --                             | Pro63, Leu44, Ser25, Ile24, Gln43, Glu22, | Asn206, Leu209, Ile16, Val231, Gln8, Phe20, Gln136, Leu137, His6, | -6.24                     | 26.47                          | Thr314, Pro261, Val260, Phe262, Pro263, Arg264, |



|   |      |       |      |                                                                                                     |                                                                                                                                |       |        |                                                                                                                                |
|---|------|-------|------|-----------------------------------------------------------------------------------------------------|--------------------------------------------------------------------------------------------------------------------------------|-------|--------|--------------------------------------------------------------------------------------------------------------------------------|
|   |      |       |      | Trp21, Val78, Gly84, Phe83, Ile86, Ala65                                                            | Trp21, Ile7, Met235, Phe169, Thr138, Ile204, Val171, Ser170                                                                    |       |        | Glu431, Tyr435, Trp346, Ile347                                                                                                 |
| 2 | 4jl7 | -7.35 | 4.12 | Ile79, Arg80, PIP, Tyr24, Gly25, Asn22, Phe26, Gly23, Lys19                                         | Val76, DHA, His27, Gly25, Glu43, Asn22, Phe26, Leu28                                                                           | -4.81 | 300.48 | Phe26, Gly25, Arg80, Ile79, Val76, His72, Gis29, Gly30, His27, Arg40, Leu28, Gly23, Tyr24                                      |
| 3 | 1nw9 | -6.86 | 9.39 | Gly269, Lys280, Asn268, Ile341, Pro338, Phe267, Ser339, Thr337, Pro336, Gly276, Leu275              | Cys287, Phe351, Pro357, Thr179, Arg178, Thr181, Ser183, Arg180, Asp186, Ser361                                                 | -6.83 | 9.89   | Thr347, Gly395, phe348, Ile396, Pro349, Trp354, phe351, Gly350, Arg355, Lys398, arg178, Leu177, Gly176, His237, Cys287, Gly288 |
| 4 | 2o21 | -7.12 | 6.04 | Phe101, Leu134, Glu149, Ala146, Phe150, Val131, Val130, Met112, Glu133, Phe109                      | Tyr26, Glu27, Asp29, Ser164, Pro165, Trp28, Asp168                                                                             | -5.3  | 129.56 | Arg143, tyr105, Gly142, tyr199, Ala97, Gln96, Thr93, Pro201, Asp100, Val145, Phe101, Arg104                                    |
| 5 | 4oar | -7.91 | 1.59 | Met756, Met801, Leu887, Val760, Leu718, Leu763, Gly722, PIP, Gln725, Leu721, Arg766, Phe778, Met759 | Phe794, Met801, Leu797, Leu718, Leu726, Gly722, Asn719, DHA, Trp755, Phe778, Met759, Glu723                                    | -2.63 | 11780  | Gln752, Ile751, Trp755, Gln916, Asn719, Ala915, Phe895, Leu726, Val730                                                         |
| 6 | 2iok | -8.09 | 1.18 | Glu353, Pro325, Ile326, Gly390, Trp393, Phe445, lys449, Ile386, Pro324, Arg394                      | Glu353, Leu391, leu387, Leu346, Met421, Met343, Val418, Met528, His524, Glu419, Gly420, Ile424, Leu349, Phe404, Ala350, Arg394 | -4.29 | 716.79 | Leu536, Glu380, Ala350, Trp383, Leu354, Thr347, Asp351, Val355, Leu539, Pro535, Tyr526, Lys529, Met528, Leu525                 |

|   |      |       |       |                                                                                                            |                                                                                                                                  |       |        |                                                                                                          |
|---|------|-------|-------|------------------------------------------------------------------------------------------------------------|----------------------------------------------------------------------------------------------------------------------------------|-------|--------|----------------------------------------------------------------------------------------------------------|
| 7 | 4rg3 | -9.24 | 0.167 | Lys40, Ile14,<br>Gly15,<br>Ala142,<br>Phe38,<br>Asp39,<br>Val143,<br>Gly46,<br>Ser147,<br>Trp50,<br>Asn388 | Leu437, Thr435,<br>Phe434, Phe507,<br>Leu145, Trp492,<br>Leu146, Phe382,<br>Gly381, Thr189,<br>Gly187, Ser188,<br>Arg329, Phe279 | -1.84 | 44580  | His166, Trp50,<br>Lys40, Arg52,<br>Asp42, Tyr49,<br>Glu172, Pro171,<br>Trp170, Ala169,<br>Thr164, phe151 |
| 8 | 2fvd | -9.19 | 0.183 | Thr14,<br>Asp145,<br>Tyr15, Gly16,<br>Lys33, Gly13,                                                        | Val64, Ala31, Leu83,<br>Phe82, Leu134, Lys89,<br>Gln85, His84, Val18,<br>Glu81, Phe80                                            | -4.76 | 326.45 | Ile10, Glu12,<br>Gly11, Gln131,<br>Asn132, Glu162,<br>Lys88, Asp86,<br>Lys89, Asp92                      |
